# Supplementary figures and images for: The Chemical Constituents of Ficus benjamina Linn. and Their Biological Activities
Source: Atypon-hosted journal article supplement (doi:10.1176/appi.psychotherapy.20190035), 2003-01-01

-----Figure 1. Consolidated Standards of Reporting Trials (CONSORT) 2010  
Flow Diagram

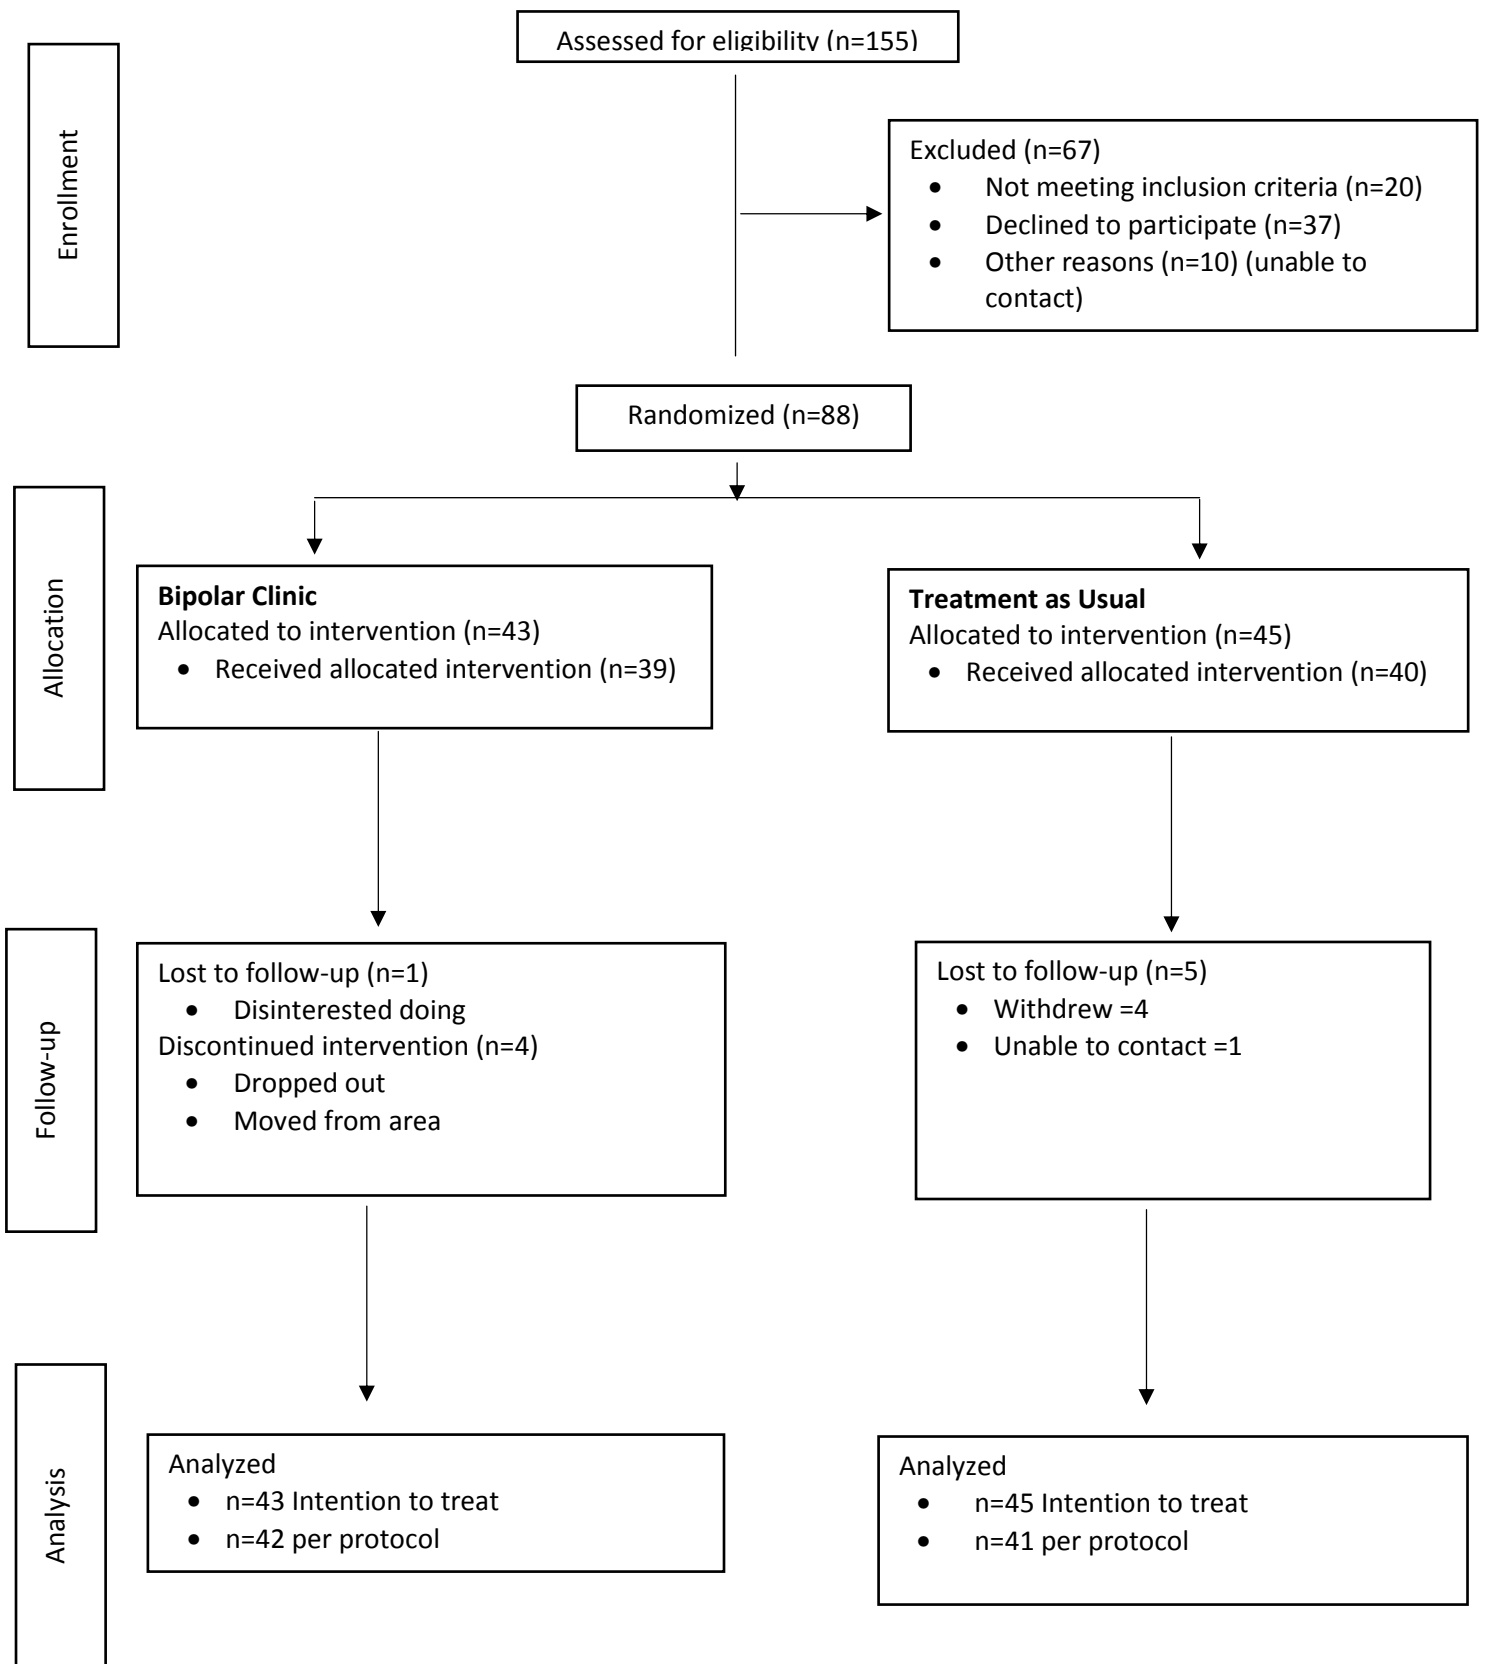

Supplement: appi.psychotherapy.20190035.ds001.pdf [file appi.psychotherapy.20190035.ds001.pdf]
